# Supplementary material for: Metal sulfide enhanced metal–organic framework nanoarrays for electrocatalytic oxidation of 5-hydroxymethylfurfural to 2,5-furandicarboxylic acid
Source: Royal Society of Chemistry journal article supplement (doi:10.1039/d2ta09426f), 2023-01-01
Supplement: d2ta09426f1.pdf [file d2ta09426f1.pdf]

## Supporting Information for

### **Metal sulfide enhanced metal-organic framework nanoarrays for electrocatalytic oxidation of 5-hydroxymethylfurfural to 2, 5-furandicarboxylic acid**

Yixuan Feng <sup>a</sup>, Kun Yang <sup>a</sup>, Richard L Smith, Jr <sup>b</sup>, Xinhua Qi <sup>a,\*</sup>

<sup>a</sup> *College of Environmental Science and Engineering, Nankai University, No. 38, Tongyan Road, Jinnan District, Tianjin 300350, China*

<sup>b</sup> *Graduate School of Environmental Studies, Tohoku University, Aramaki Aza Aoba 468-1, Aoba-ku, Sendai 980-8572, Japan*

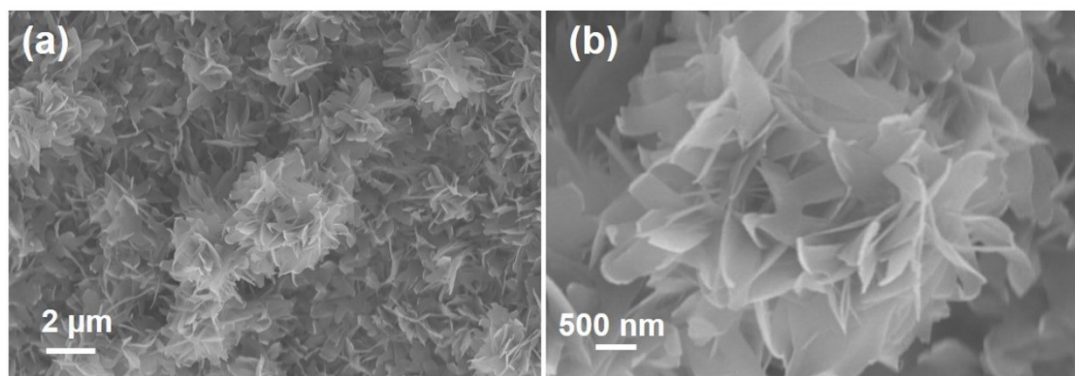

Fig. S1. SEM images of NiS-MOF.

---

\* Corresponding author. E-mail: [qixinhua@nankai.edu.cn](mailto:qixinhua@nankai.edu.cn) (X. Qi).

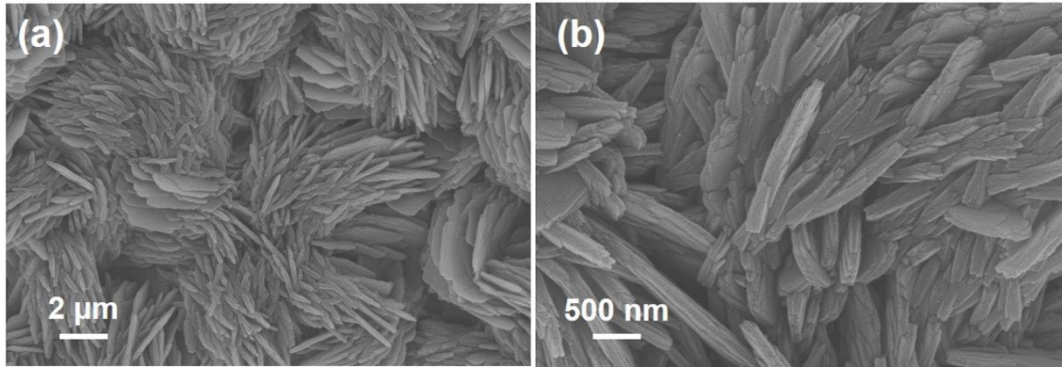

Fig.S2. SEM images of NiFeS-MOF.

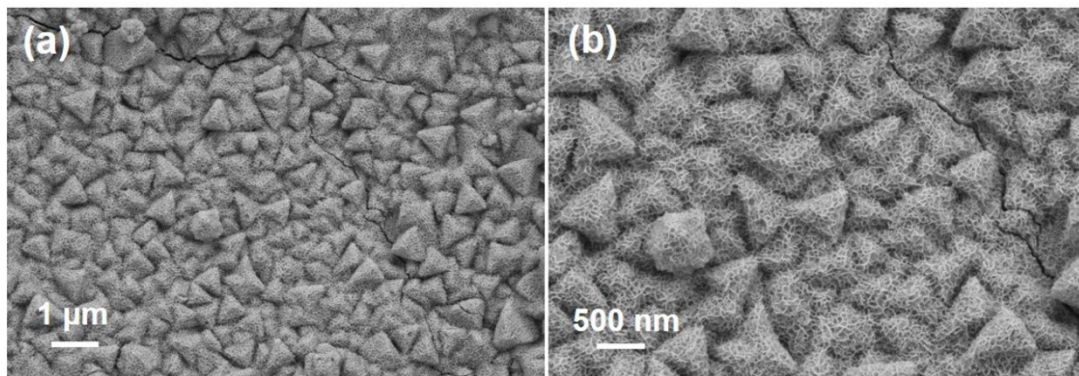

Fig.S3. SEM images of NiCoS-MOF.

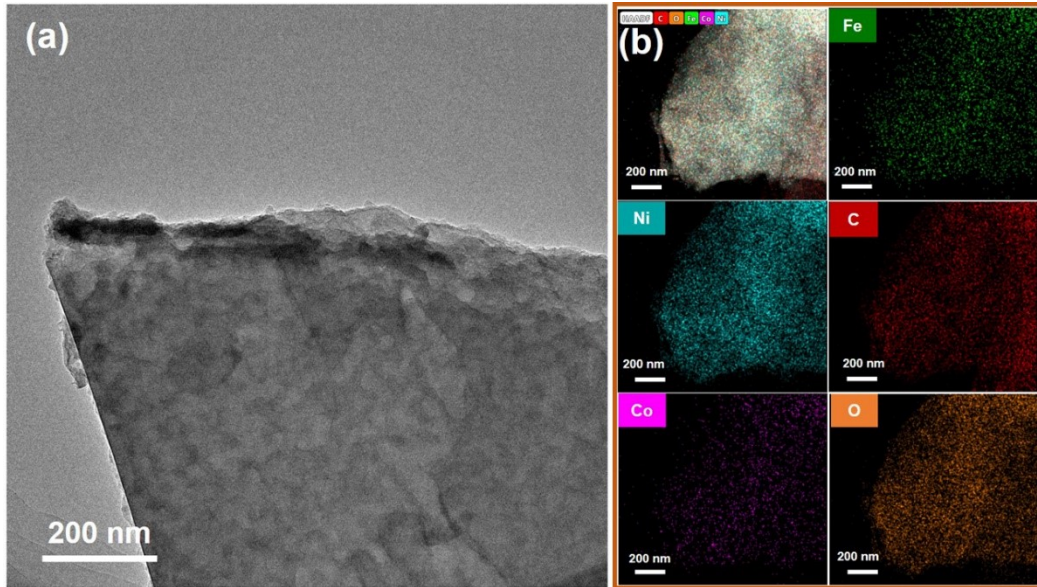

Fig. S4. NiCoFe-MOF nanosheet: (a) TEM image, (b) elemental maps.

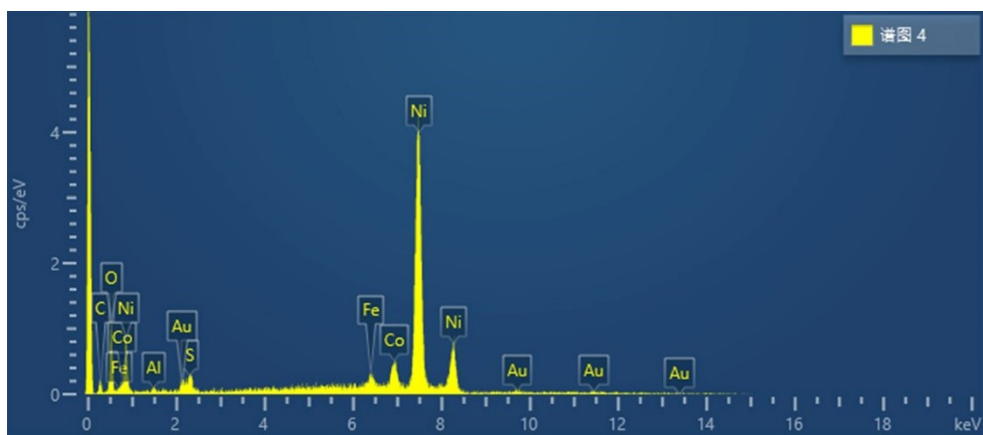

Fig. S5. SEM-EDS of NiCoFeS-MOF.

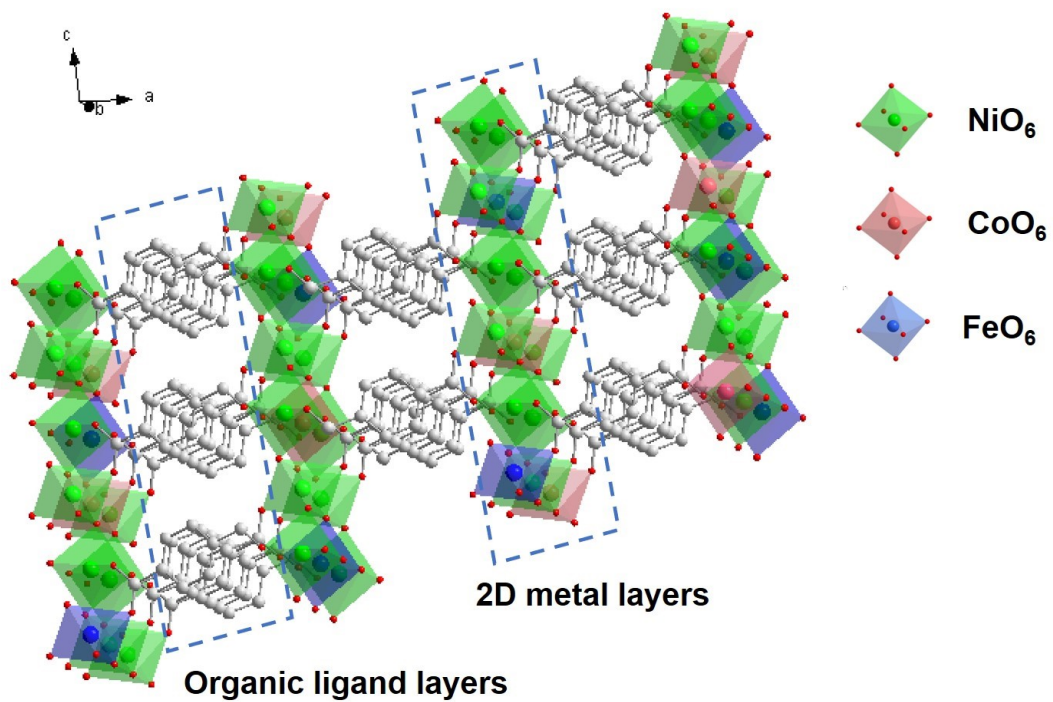

Fig. S6. Crystal structure schematic diagram of 2D NiCoFe-MOF nanosheets.

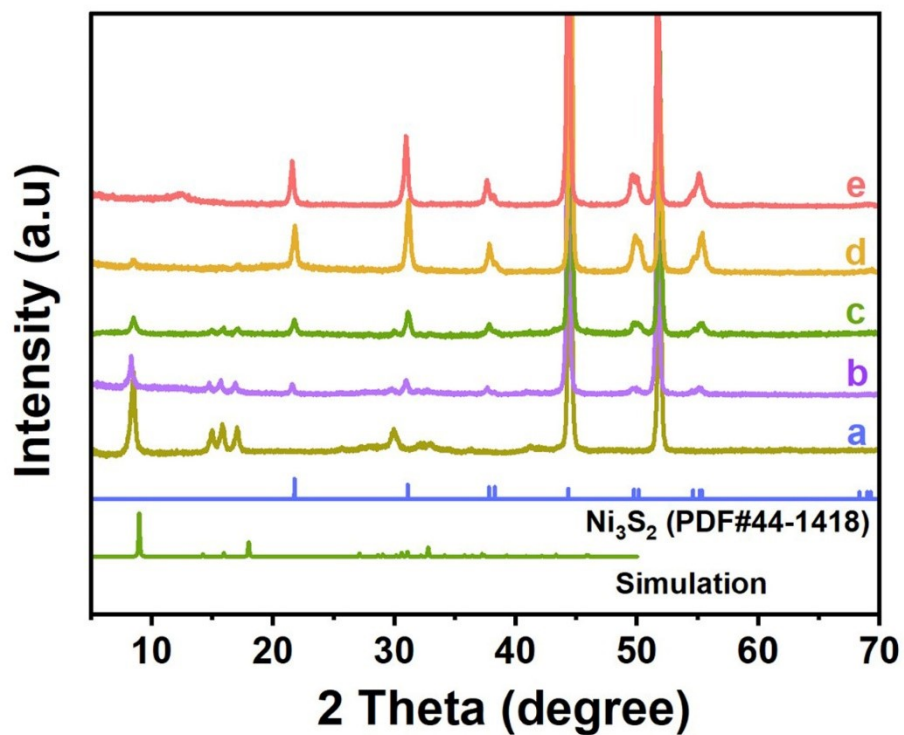

Fig. S7. XRD patterns of: (a) CoFe-Ni<sub>3</sub>S<sub>2</sub> (without TPA), (b) NiCoFe-MOF (without TAA), and NiCoFeS-MOF prepared with different doses of TAA (c) 50 mg, (d) 80 mg, and (e) 150 mg.

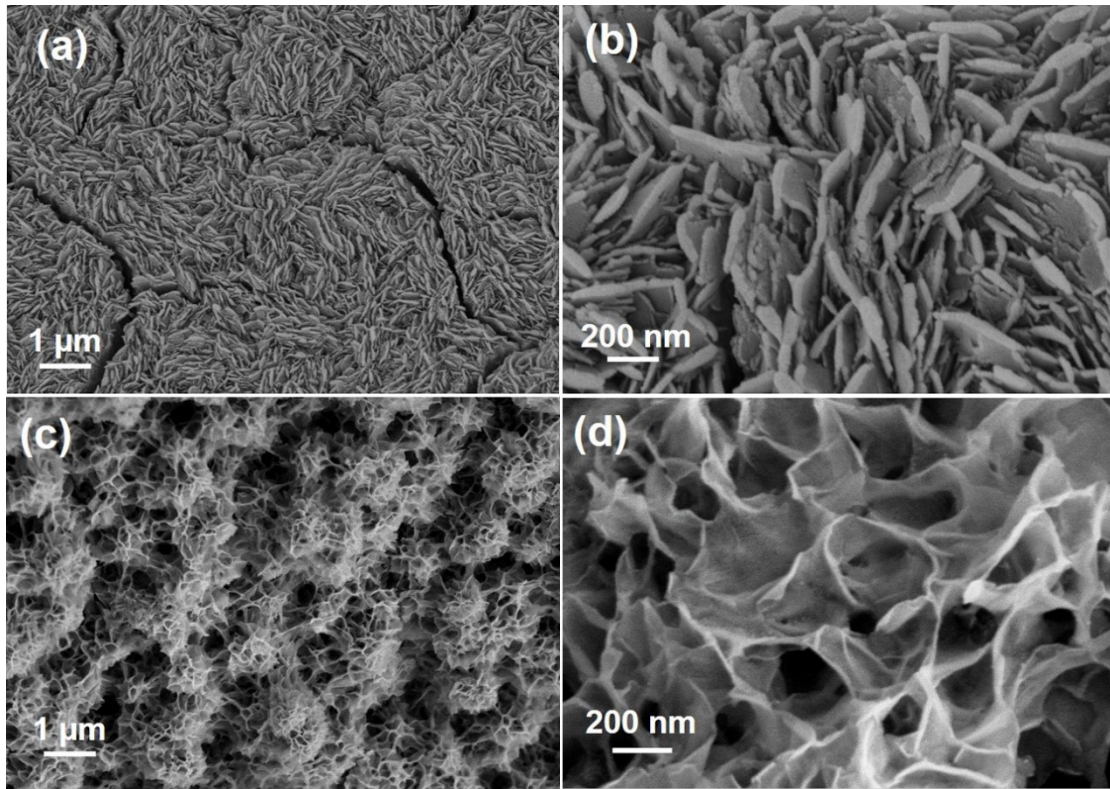

Fig. S8. SEM images of: (a) NiCoFe-MOF, (b) NiCoFe-MOF enlarged, (c) CoFe-Ni<sub>3</sub>S<sub>2</sub> (d) CoFe-Ni<sub>3</sub>S<sub>2</sub> enlarged.



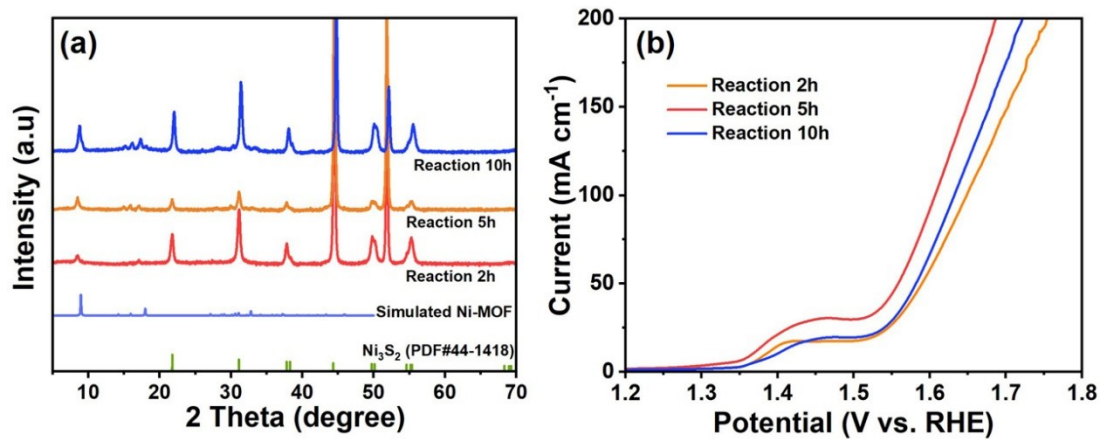

Fig. S9. Characterization of NiCoFeS-MOF material prepared at different reaction times under solvothermal conditions: (a) XRD patterns; (b) LSV curves of material in

1 M KOH.

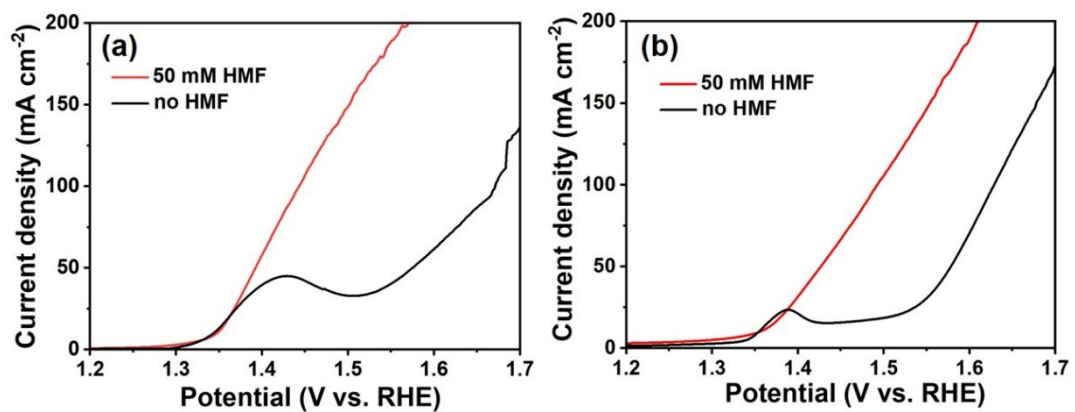

Fig.S10. LSV curves of (a) NiCoFe-MOF and (b) CoFe-Ni<sub>3</sub>S<sub>2</sub> in 1 M KOH with or without 50 mM HMF addition.

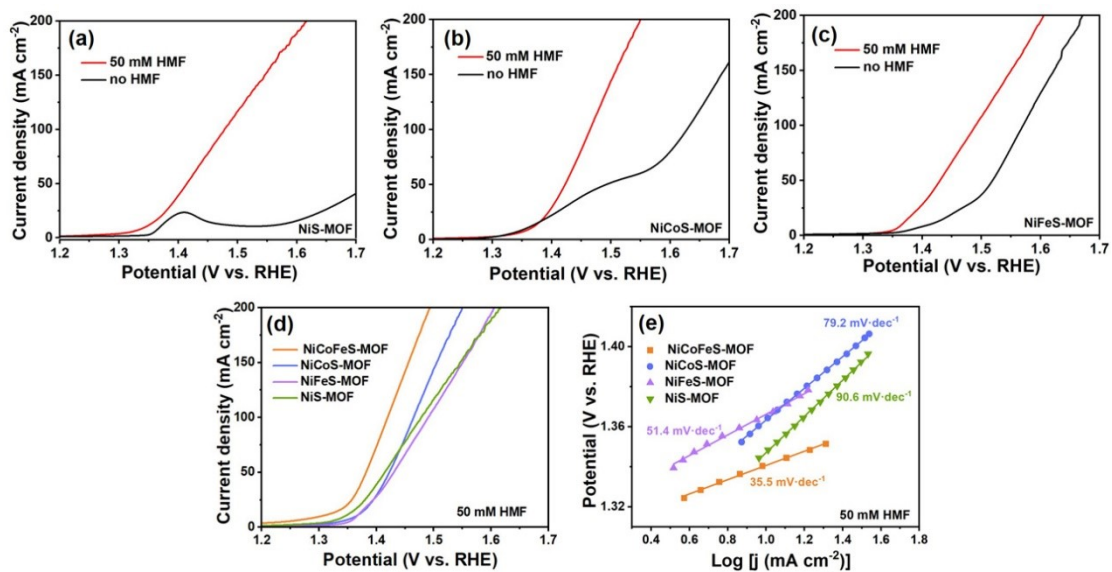

Fig. S11. LSV curves of: (a) NiS-MOF, (b) NiCoS-MOF and (c) NiFeS-MOF electrodes in 1 M KOH with or without 50 mM HMF. (e) LSV curves and (f) corresponding Tafel plots of NiCoFeS-MOF, NiS-MOF and CoFe-Ni<sub>3</sub>S<sub>2</sub> electrodes in 1 M KOH with 50 mM HMF.

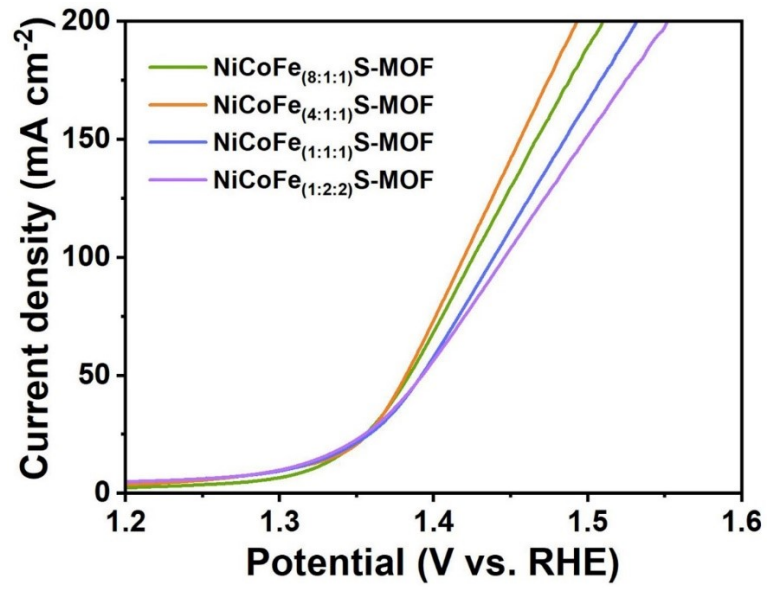

Fig. S12. LSV curves of sample catalysts prepared at different metal salt precursor ratios.

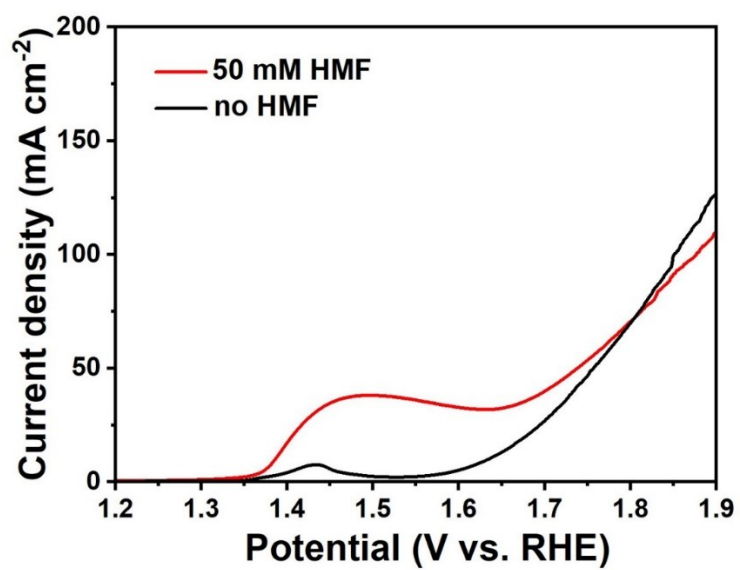

Fig. S13. Linear sweep voltammetry curves of bare nickel foam electrode in 1 M KOH with or without 50 mM HMF.

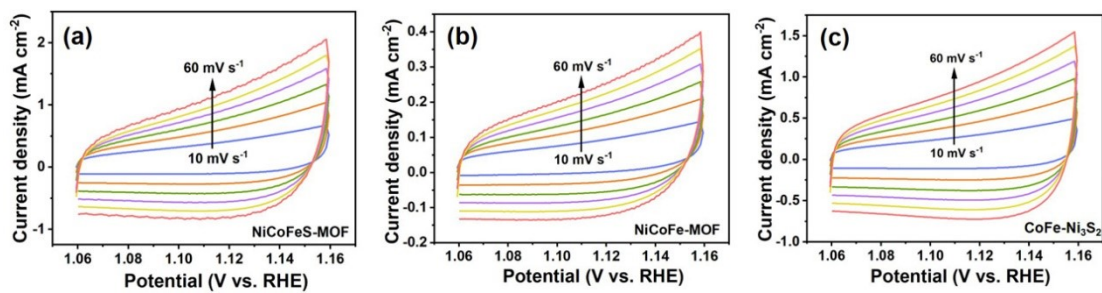

Fig. S14. Cyclic voltammetry curves for NiCoFeS-MOF, NiCoFe-MOF and CoFe-

Ni<sub>3</sub>S<sub>2</sub> electrodes at scan rates of (10, 20, 30, 40, 50, 60) mV s<sup>-1</sup>.

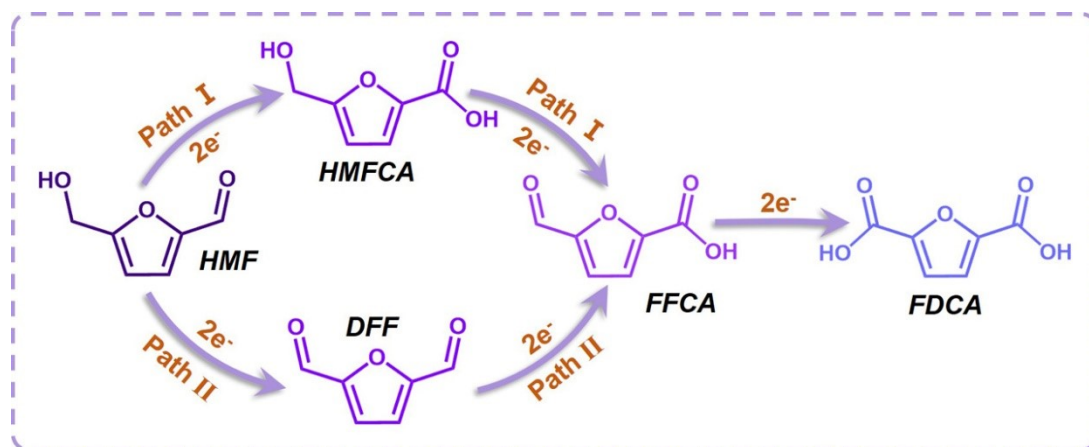

Fig. S15. Two possible pathways for oxidation of 5-hydroxymethyl-2-furfural (HMF) to 2,5-furandicarboxylic acid (FDCA).

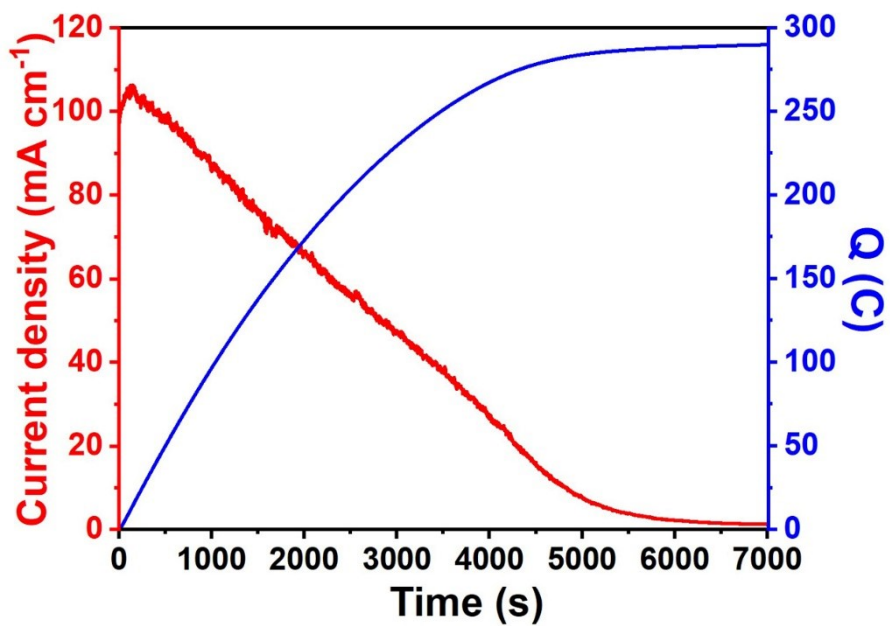

Fig. S16. Current-time and charge-time plots for NiCoFeS-MOF electrodes derived from chronoamperometry.



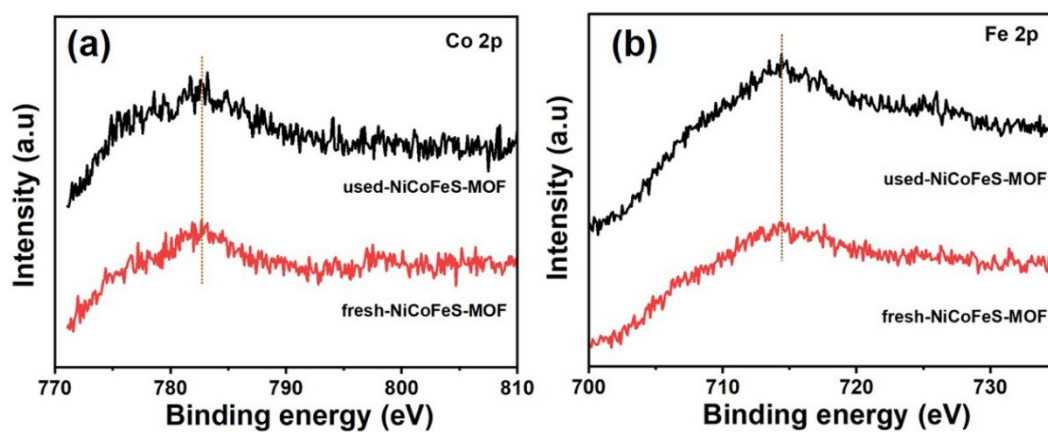

Fig. S17. XPS spectra of the fresh and used-NiCoFeS-MOF electrode after electrocatalytic oxidation of HMF, (a) Co 2p, (b) Fe 2p.

Table S1. Oxygen evolution reaction (OER) performance of NiCoFeS-MOF electrocatalyst and literature electrocatalysts.

| Catalyst                                               | Electrolyte | Current density<br>(mA · cm <sup>-2</sup> ) | Overpotential<br>(mV) | Ref.      |
|--------------------------------------------------------|-------------|---------------------------------------------|-----------------------|-----------|
| NiCoFeS-MOF                                            | 1.0 M KOH   | 50                                          | 320                   | This work |
| NiS/Fe <sub>3</sub> O <sub>4</sub> HNPs@CN             | 1.0 M KOH   | 10                                          | 243                   | 1         |
| NiS/NF                                                 | 1.0 M KOH   | 10                                          | 335                   | 2         |
| Co <sub>9</sub> S <sub>8</sub> @MoS <sub>2</sub> -0.5  | 1.0 M KOH   | 10                                          | 340                   | 3         |
| NiFeZn-MOF                                             | 1.0 M NaOH  | 50                                          | 350                   | 4         |
| Co <sub>9</sub> S <sub>8</sub> /NSCP                   | 0.1 M KOH   | 10                                          | 370                   | 5         |
| Co/Co <sub>9</sub> S <sub>8</sub> @NSOC-800            | 1.0 M KOH   | 10                                          | 373                   | 6         |
| Ni <sub>3</sub> Fe-Co <sub>9</sub> S <sub>8</sub> /rGO | 0.1 M KOH   | 10                                          | 390                   | 7         |
| NiS@N/S-C                                              | 1.0 M KOH   | 10                                          | 417                   | 8         |

Table S2. Simulation parameters of equivalent circuit components showing fitted values for solution resistance ( $R_s$ ), charge transfer resistance ( $R_{ct}$ ), double-layer capacitance ( $C_{dl}$ ) and Warburg impedance ( $Z_w$ ) determined with ZSimpWin software

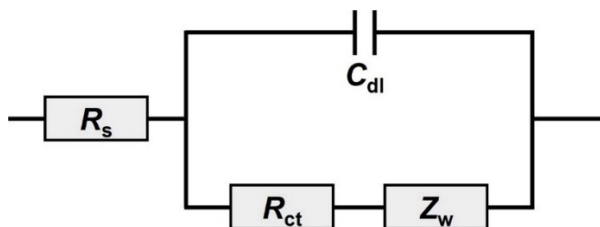

| Samples                             | $R_{ct}$ ( $\Omega$ ) | $R_s$ ( $\Omega$ ) | $C_{dl}$ (F) | $Z_w$ |
|-------------------------------------|-----------------------|--------------------|--------------|-------|
| NiCoFeS-MOF                         | 0.52                  | 1.27               | 0.37         | 2.26  |
| NiCoFe-MOF                          | 0.77                  | 1.02               | 0.31         | 1.79  |
| CoFe-Ni <sub>3</sub> S <sub>2</sub> | 1.60                  | 1.50               | 0.15         | 1.40  |

Table S3. Electrocatalytic oxidation of 5-hydroxymethylfurfural (HMF) to 2,5-furandicarboxylic acid (FDCA) for non-platinum group electrodes

| Electrode                             | Electrolyte                                        | Applied potential (vs. RHE) | HMF conversion (%) | FDCA yield (%) | FE (%) | Ref.      |
|---------------------------------------|----------------------------------------------------|-----------------------------|--------------------|----------------|--------|-----------|
| NiCoFeS-MOF                           | 1 M KOH +<br>50 mM HMF                             | 1.39 V                      | 100                | 99             | 99     | This work |
| MnO <sub>x</sub>                      | pH 1 H <sub>2</sub> SO <sub>4</sub> +<br>20 mM HMF | 2.0 V                       | >99.9 (60 °C)      | 53.8           | -      | 9         |
| NiO-CMK-1                             | 0.2 M KOH +<br>20 mM HMF                           | 1.73 V                      | 65                 | 51.4           | -      | 10        |
| NiFe-LDHs                             | 1 M NaOH +<br>5 mM HMF                             | 1.55 V                      | 95.5 (55 °C)       | 84.9           | ~90    | 11        |
| P-HEOs                                | 1 M KOH +<br>10 mM HMF                             | 1.50 V                      | 99                 | 97.4           | 96.6   | 12        |
| NiCo <sub>2</sub> O <sub>4</sub>      | 1 M KOH + 5<br>mM HMF                              | 1.5 V                       | 99.6               | 90.4           | -      | 13        |
| d-NiFe LDH/CP                         | 1 M KOH +<br>10 mM HMF                             | 1.48 V                      | 97.35              | 96.8           | 84.47  | 14        |
| NiS <sub>x</sub> /Ni <sub>2</sub> P   | 1 M KOH +<br>10 mM HMF                             | 1.46 V                      | ~100               | ~98.5          | -      | 15        |
| om-Co <sub>3</sub> O <sub>4</sub> /NF | 1 M KOH +                                          | 1.457 V                     | 100                | > 99.8%        | ~100   | 16        |

|                                        |                        |         |      |      |            |    |
|----------------------------------------|------------------------|---------|------|------|------------|----|
|                                        | 10 mM HMF              |         |      |      |            |    |
| NiSe@NiO <sub>x</sub>                  | 1 M KOH +<br>10 mM HMF | 1.423 V | ~100 | ~99  | ~99        | 17 |
| Ni <sub>3</sub> S <sub>2</sub> /NF     | 1 M KOH +<br>10 mM HMF | 1.423 V | -    | -    | 96 ~<br>99 | 18 |
| CoFe PBA                               | 1 M KOH +<br>10 mM HMF | 1.42 V  | -    | 94   | 94         | 19 |
| t-Ni <sub>1</sub> Co <sub>1</sub> -MOF | 1 M KOH +<br>10 mM HMF | 1.4 V   | 98   | ~100 | ~100       | 20 |
| Cu <sub>x</sub> S@NiCo-LDH             | 1 M KOH +<br>10 mM HMF | 1.32 V  | -    | ~99  | ~99        | 21 |

---

## Reference

1. K. Srinivas, Y. Chen, B. Wang, B. Yu, X. Wang, Y. Hu, Y. Lu, W. Li, W. Zhang and D. Yang, *ACS Appl. Mater. Interfaces*, 2020, **12**, 31552-31563.
2. W. Zhu, X. Yue, W. Zhang, S. Yu, Y. Zhang, J. Wang and J. Wang, *Chem. Commun.*, 2016, **52**, 1486-1489.
3. J. Li, G. Li, J. Wang, C. Xue, X. Li, S. Wang, B. Han, M. Yang and L. Li, *Inorg. Chem. Front.*, 2020, **7**, 191-197.
4. X. Wei, N. Li and N. Liu, *Electrochim. Acta*, 2019, **318**, 957-965.
5. X. Gao, Z. Xu and G. Li, *Chem. Eng. J.*, 2022, **431**, 133385.
6. J. Du, R. Wang, Y.-R. Lv, Y.-L. Wei and S.-Q. Zang, *Chem. Commun.*, 2019, **55**, 3203-3206.
7. X. Hu, T. Huang, Y. Tang, G. Fu and J.-M. Lee, *ACS Appl. Mater. Interfaces*, 2019, **11**, 4028-4036.
8. L. Yang, M. Gao, B. Dai, X. Guo, Z. Liu and B. Peng, *Electrochimica Acta*, 2016, **191**, 813-820.
9. S. R. Kubota and K. S. Choi, *ChemSusChem*, 2018, **11**, 2138-2145.
10. F. J. Holzhaeuser, T. Janke, F. Oeztas, C. Broicher and R. Palkovits, *Adv. Sustain. Syst.*, 2020, **4**, 1900151.
11. M. Zhang, Y. Q. Liu, B. Y. Liu, Z. Chen, H. Xu and K. Yan, *ACS Catal.*, 2020, **10**, 5179-5189.
12. K. [Gu, D. Wang, C. Xie, T. Wang, G. Huang, Y. Liu, Y. Zou, L. Tao and S. Wang, *Angew. Chem. Int. Ed.*, 2021, **60**, 20253-20258.
13. M. J. Kang, H. Park, J. Jegal, S. Y. Hwang, Y. S. Kang and H. G. Cha, *Appl. Catal. B*, 2019, **242**, 85-91.
14. Y.-F. Qi, K.-Y. Wang, Y. Sun, J. Wang and C. Wang, *ACS Sustain. Chem. Eng.*, 2022, **10**, 645-654.
15. B. Zhang, H. Fu and T. Mu, *Green Chem.*, 2022, **24**, 877-884.
16. C. Wang, F. Schuth, H. Bongard and M. Yu, *ChemSusChem*, 2021, **14**, 5199-5206.
17. L. Gao, Z. Liu, J. Ma, L. Zhong, Z. Song, J. Xu, S. Gan, D. Han and L. Niu, *Appl. Catal. B*, 2020, **261**, 118235.
18. B. You, X. Liu, N. Jiang and Y. J. Sun, *J. Am. Chem. Soc.*, 2016, **138**, 13639-13646.
19. W. Hadinata Lie, C. Deng, Y. Yang, C. Tsounis, K.-H. Wu, M. V. Chandra Hioe, N. M. Bedford and D.-W. Wang, *Green Chem.*, 2021, **23**, 4333-4337.
20. X. Deng, M. Li, Y. Fan, L. Wang, X.-Z. Fu and J.-L. Luo, *Appl. Catal. B*, 2020, **278**, 119339.
21. X. H. Deng, X. M. Kang, M. Li, K. Xiang, C. Wang, Z. P. Guo, J. J. Zhang, X. Z. Fu and J. L. Luo, *J. Mater. Chem. A*, 2020, **8**, 1138-1146.
